# Supplementary material
Source: Springer Nature journal article supplement (https://www.springermedizin.de/resource/supplementary/12955_2013_1258_MOESM4_ESM.pdf/9559178)
Supplement: MOESM4 [file 9559178]

## Supplemental Appendix B: Assessing Reliability by Estimating Variances using Linear Models

The variances used to calculate  $R_{\Lambda}$  are estimated in the longitudinal mixed effects model:

$$Y_i = \mu + X_i\beta + Z_i\gamma + \varepsilon_r$$

where  $Y_i$  is the vector of responses for patient  $i$ ,  $X_i$  and  $Z_i$  are matrices of the known covariates,  $\beta$  is a matrix of fixed effects,  $\gamma \sim \text{Gaussian}(0, G)$  is a matrix of random effects and  $\varepsilon_r \sim \text{Gaussian}(0, \Sigma_r)$  is a matrix of residual effects that specify the repeated measurement structure. The longitudinal mixed-effects model was fit with main effects for treatment group (5 mg BID, 25 mg BID, 100 mg BID, 200 mg BID, and Placebo), time in months (1, 2, and 3 months post-Baseline), and the Baseline value of the IBS-QOL as fixed effects. The interaction term for treatment and time as well as a quadratic term for time were also fit. Additionally, random effects were fit for the intercept and time and a residual effect for time was further fit to partition variance associated with the correlation between repeated administrations of the IBS-QOL.

The  $R_{\Lambda}$  statistic[1] was then calculated where

$$R_{\Lambda} = 1 - |\Sigma_R V^{-1}|$$

is similar to the Wilks'  $\Lambda$  statistic as well as the classical definition of reliability, albeit in matrix form. In the above equation,  $\Sigma_R$  is a  $p \times p$  matrix for  $p$  time points and it represents the residual variability, i.e., error, due to effects of the longitudinal model;  $V$  is a  $p \times p$  matrix of elements that represent the total observed variance. The matrix  $\Sigma_R V^{-1}$ , therefore, contains elements that represent the ratio of variance not accounted for by the model to the total observed variance in the data. For example, the interpretation of the  $\Sigma_R V^{-1}$  matrix is that it contains available information about the measurement of the latent constructs within the data. By estimating the  $\Sigma V^{-1}$  and other matrices via the mixed effects model above, variables that could affect traditional ICC measurements, e.g., different treatments, can be accounted for, reducing any inherent bias in the estimation of reliability.

The determinant of  $\Sigma V^{-1}$ , then, is an estimate of the variability within the  $p \times p$  elements that comprise the matrix. Therefore, summarization of the matrix provides the basis for test statistics that allow inferences about the consistency of the instrument, e.g., the IBS-QOL, over repeated measurements, but since the linear model accounts for treatment and time effects the  $R_{\Lambda}$  statistic is controlled for these effects over the repeated measurements of the IBS-QOL.  $R_{\Lambda}$  can be considered as the joint reliability over the course of repeated measurements representing the concept that as more information is collected, more is known about the instrument—a concept that is inherent to Coefficient  $\alpha$  as well.

The similar measure,  $R_T$ [2] was also calculated:

$$R_T = 1 - \frac{\text{trace}(\Sigma_R)}{\text{trace}(V)}$$

where  $\Sigma_R$  and  $V$  are defined similarly to above.  $R_T$  is similar to  $R_\Lambda$ , however, it represents a quantity akin to the average reliability over repeated measurements of an instrument, conditional on the longitudinal model fit. Both  $R_\Lambda$  and  $R_T$  were computed on the IBS-QOL total score to assess reproducibility of scores over repeated administrations.

## References

1. Laenen A, Alonso A, Molenberghs G, Vangeneugden T. **Reliability of a Longitudinal Sequence of Scale Ratings.** *Psychometrika.* 2009;**74**:49-64.
2. Laenen A, Alonso A, Molenberghs G. **A Measure for the Reliability of a Rating Scale Based on Longitudinal Clinical Trial Data.** *Psychometrika.* 2007;**72**:443-448.
